# Supplementary material for: Molecular Changes on Maternal–Fetal Interface in Placental Abruption—A Systematic Review
Source: MDPI journal article supplement (doi:10.3390/ijms22126612), 2021-06-21
Supplement: s1 [file s1]

# Supplementary Materials I

**Table S1.** The search methods for used databases.

| Database | Number of<br>retrieved<br>studies | Search strategy                                                                                                                                                                                                                                                                                                                                                                                                                                                                                                                            |
|----------|-----------------------------------|--------------------------------------------------------------------------------------------------------------------------------------------------------------------------------------------------------------------------------------------------------------------------------------------------------------------------------------------------------------------------------------------------------------------------------------------------------------------------------------------------------------------------------------------|
| PubMed   | 562                               | ((placenta* AND abrupt*) OR abruptio placentae[MeSH]) AND (immun* OR Allergy and Immunology [MeSH] OR decidua* OR Decidua[MeSH] OR endometri* OR endometrium[MeSH] OR myometr* OR Myometrium[MeSH] OR trophoblast* Trophoblasts[MeSH] OR HEEC* OR cytotoxic* OR Cytotoxicity, Immunologic[MeSH] OR immunohistochemist* OR immunohistochemistry[Mesh] OR receptor* OR Receptors, Immunologic[MeSH] OR (immunolog* AND factor*) OR Immunologic Factors[MeSH] OR antigen* OR Antigens, Surface[MeSH] OR (maternal* AND fetal* AND interfac*)) |
| Scopus   | 146                               | TITLE-ABS-KEY(((placenta* AND abrupt*) AND (immun* OR decidua* OR endometri* OR myometr* OR trophoblast* OR HEEC* OR cytotoxic* OR immunohistochemist* OR receptor* OR antigen* OR (maternal* AND fetal* AND interfac*))) AND NOT INDEX(medline)                                                                                                                                                                                                                                                                                           |

**Table S2.** Data collection from the included studies.

| Authors          | Year | Type of study    | Hypothesis                                                                                                                       | Material examined                                                                                                                                              | Molecules investigated                                                                                                                                   | Effects observed in PA samples                                                                                                                                                                                                                                                                                                                                                                                                                                                                                                     |
|------------------|------|------------------|----------------------------------------------------------------------------------------------------------------------------------|----------------------------------------------------------------------------------------------------------------------------------------------------------------|----------------------------------------------------------------------------------------------------------------------------------------------------------|------------------------------------------------------------------------------------------------------------------------------------------------------------------------------------------------------------------------------------------------------------------------------------------------------------------------------------------------------------------------------------------------------------------------------------------------------------------------------------------------------------------------------------|
| Nishimura et al. | 2020 | Research article | Thrombin induces myometrial contractions by direct activation of myosin and indirect increase in prostaglandin synthesis.        | 2 myometrium samples from PA + human myometrium cells cultures of nonpregnant women + human myometrium cells cultures of pregnant woman                        | THR, PAR1, MLC2, MLCK, ROCK, COX2, PGE2, PGF2 $\alpha$ , IL-1 $\beta$ , PTGER1, PTGER3, PTGFR, OXTR, GJA1, PR total, PR-B                                | $\uparrow$ THR, $\uparrow$ PAR1, MLC2 $\downarrow$ , MLCK $\downarrow$ , ROCK $\downarrow$ , $\uparrow$ COX2, $\uparrow$ PGE2, $\uparrow$ PGF2 $\alpha$ , $\uparrow$ IL-1 $\beta$ , PTGER1 $\odot$ , $\downarrow$ PTGER3, $\downarrow$ PTGFR, OXTR $\odot$ , GJA1 $\odot$ , PR-A $\odot$ , $\downarrow$ PR total, $\downarrow$ PR-B                                                                                                                                                                                                |
| Sinkey et al.    | 2020 | Research article | Thrombin-induced decidual CSF-2 acting via trophoblast-expressed CSF2R promotes abruption-related preterm birth by weakening FM. | 10 decidua basalis samples from term birth (5 precontraction CC, 5 post-contraction CC), 8 decidua basalis samples from PTB, 8 decidua basalis samples from PA | CSF-2, CSF2R $\alpha$ , ERK1/2 MAPK, NF- $\kappa$ B, p38 MAPK, STAT5, STAT3, Akt, NF-kB p65, MMP3, MMP7, MMP9, IL-1 $\beta$ , IL-6, IL-8                 | <u>Decidua</u> : $\uparrow$ CSF-2, ERK1/2 MAPK $\downarrow$ , NF- $\kappa$ B $\downarrow$ , p38 MAPK $\odot$<br><u>Trophoblast</u> : $\uparrow$ CSF2R $\alpha$ , STAT5 $\downarrow$ , p38 MAPK $\boxtimes$ , STAT3 $\odot$ , ERK1/2 $\odot$ , AKT $\odot$ , NF-kB p65 $\odot$<br><u>FM</u> : $\uparrow$ IL-1 $\beta$ *, $\uparrow$ MMP9*, MMP3 $\odot$ , MMP7 $\odot$ , IL-6 $\odot$ , IL-8 $\odot$                                                                                                                                |
| Singh et al.     | 2019 | Research article | Inflammation was not a feature of placental abruption. It seems to be an acute event.                                            | Placental samples:<br>13 non-labor controls<br>13 CA-PTL<br>8 I-PTL<br>7 PA-PTL                                                                                | p65, AP-1, CREB, PGHS-2, OT, OTR, CX-43, IL-1 $\beta$ , IL-6, TNF $\alpha$ , IL-4, IL-10, IL-8, CXCL1, CXCL2, CCL2, CCL5, NF $\kappa$ B, MAPK/AP-1, CREB | <u>Choriodecidua</u> : CREB $\downarrow$ , IL-1 $\beta$ $\odot$ , $\uparrow$ IL-6, $\uparrow$ TNF $\alpha$ , IL-4 $\odot$ , $\uparrow$ IL-10, $\uparrow$ CXCL2<br><u>Amnion</u> : $\uparrow$ PGHS-2, $\uparrow$ IL-1 $\beta$ , $\uparrow$ TNF $\alpha$ , IL-4 $\odot$ , IL-10 $\odot$ , $\uparrow$ IL-8, $\uparrow$ CXCL2, $\uparrow$ OT<br><u>Myometrium</u> : IL-1 $\beta$ $\odot$ , IL-4 $\odot$ , IL-10 $\odot$<br><u>Placenta</u> : IL-1 $\beta$ $\odot$ , IL-4 $\odot$ , IL-10 $\odot$ , $\uparrow$ CXCL2, $\downarrow$ CCL2 |

| Authors                 | Year | Type of study    | Hypothesis                                                                                                                                                                                                 | Material examined                                         | Molecules investigated                                                                                                                                                                                                                       | Effects observed in PA samples                                                                                                                                                                                                                                                                                                                                                                                                                                                                                                         |
|-------------------------|------|------------------|------------------------------------------------------------------------------------------------------------------------------------------------------------------------------------------------------------|-----------------------------------------------------------|----------------------------------------------------------------------------------------------------------------------------------------------------------------------------------------------------------------------------------------------|----------------------------------------------------------------------------------------------------------------------------------------------------------------------------------------------------------------------------------------------------------------------------------------------------------------------------------------------------------------------------------------------------------------------------------------------------------------------------------------------------------------------------------------|
| Mhatre et al.           | 2016 | Research article | Thrombin, via PAR1 activation, augments LPS-induced HEEC production of chemokines. Inflammatory response is generated by synergistically PA and bacterial infection.                                       | HEECs culture                                             | THR, PAR1, PAR4, TLR4, LPS, IL-8, IL-1 $\beta$ , IL-6, IL-10, IL-12, IL-17, G-CSF, GM-CSF, IFN $\gamma$ , MCP1/CCL2, MIP-1 $\alpha$ /CCL3, MIP-1 $\beta$ /CCL4, RANTES/CCL5, TNF $\alpha$ , VEGF, GRO- $\alpha$ , IP-10/CXCL10, SOCS1, SOCS3 | <u>POSSIBLE EFFECT:</u><br>PAR1 $\nearrow$ $\square$ , PAR4 $\odot$ , $\odot$ TLR4 expression, $\odot$ IL-1 $\beta$ , $\uparrow$ IL-6, $\uparrow$ IL-8, $\uparrow$ / $\odot$ IL-10, $\uparrow$ / $\odot$ / $\downarrow$ IL-17, $\uparrow$ / $\odot$ IFN $\gamma$ , $\uparrow$ / $\odot$ TNF $\alpha$ , $\uparrow$ G-CSF, $\uparrow$ / $\odot$ GM-CSF, $\uparrow$ GRO- $\alpha$ , $\uparrow$ MCP-1, $\uparrow$ / $\odot$ VEGF, $\odot$ MIP-1 $\beta$ , $\odot$ RANTES, $\uparrow$ / $\odot$ IP-10, $\uparrow$ SOCS1, $\downarrow$ SOCS3 |
| Kumar et al.            | 2014 | Research article | GM-CSF is a critical common intermediate in the thrombin and TNF FM weakening pathways. Thrombin applied to only the maternal side causes FM weakening in the same manner as when both sides were exposed. | Model of FM, maternal and fetal side presented separately | THR, TNF $\alpha$ , GM-CSF, PAI-1, cytokine array, protease array                                                                                                                                                                            | <u>POSSIBLE EFFECT:</u><br><u>Maternal side:</u><br>$\uparrow$ GM-CSF, $\downarrow$ PAI-1, $\uparrow$ MMP1, $\uparrow$ MMP3, $\uparrow$ Kallikriens 3, $\uparrow$ Kallikriens 6, $\uparrow$ Kallikriens 7<br><u>Fetal side:</u><br>GM-CSF $\odot$ , $\downarrow$ PAI-1                                                                                                                                                                                                                                                                 |
| Puthiyachirakkal et al. | 2013 | Research article | Thrombin weakens the amnion ECM directly (rather than through PARs and also in killed amnion cells) and also activates MMPs.                                                                               | Culture of amnion cells                                   | THR, PARs, MMP2, MMP9, PGE2                                                                                                                                                                                                                  | <u>POSSIBLE EFFECT:</u><br>MMP2 $\nearrow$ $\square$ , MMP9 $\odot$                                                                                                                                                                                                                                                                                                                                                                                                                                                                    |

| Authors            | Year | Type of study    | Hypothesis                                                                                                                                                                      | Material examined                                                                                                                          | Molecules investigated                                                            | Effects observed in PA samples                                                                                                                                                                                                       |
|--------------------|------|------------------|---------------------------------------------------------------------------------------------------------------------------------------------------------------------------------|--------------------------------------------------------------------------------------------------------------------------------------------|-----------------------------------------------------------------------------------|--------------------------------------------------------------------------------------------------------------------------------------------------------------------------------------------------------------------------------------|
| Lockwood et al.    | 2012 | Research article | Abruption-associated preterm delivery is initiated by functional progesterone withdrawal. Thrombin down-regulates decidual PR expression via ERK1/2 phosphorylation.            | 7 placenta tissue samples from PA<br>CONTROL: 7 placenta tissue samples from idiopathic PTB<br>Decidual cell cultures                      | PR (PR-A, PR-B), GR, NF- $\kappa$ B, p38 MAPK, ERK1/2 MAPK                        | <u>Decidual cells:</u> ↓PR, ↓PR-A, ↓PR-B, GR●, ↑pERK1/2, total ERK1/2●<br><u>Interstitial trophoblast:</u> PR - absent, GR●, total ERK1/2●, pERK1/2●<br><u>POSSIBLE EFFECT:</u><br><u>Decidual cells:</u> NF- $\kappa$ B●, p38 MAPK● |
| Avagliano et al.   | 2011 | Research article | An imbalance of COX level is not related to placental abruption. An imbalance of COX level may be present in cases with MA and CA but it is not related to placental abruption. | 16 placentas with abruption<br>CONTROL: 26 normal placentas, 5 MA cases without abruption, 5 CA cases without abruption                    | COX1, COX2                                                                        | COX1 ●, COX2 ●                                                                                                                                                                                                                       |
| Kumar et al.       | 2011 | Research article | Thrombin weakens AM directly whereas cytokines weaken AM indirectly by causing the release of soluble intermediates from the choriodecidua.                                     | FM model of full thickness FM and amnion separately                                                                                        | THR, IL-1 $\beta$ , TNF $\alpha$ , NF $\kappa$ B inhibitor, LA, MMP9, TIMP3, PARP | <u>POSSIBLE EFFECT:</u><br>↑MMP9, ↓TIMP3, ↑PARP cleavage                                                                                                                                                                             |
| Snegovskikh et al. | 2009 | Research article | IL-1 $\beta$ stimulates VEGF and neuropilin-1/-2 in term decidual stromal cells. It provides a mechanism by which IAI can increase the risk of PA.                              | Decidual stromal cells culture (from term placentae)<br>14 placental tissue samples with and without intra-amniotic infection/inflammation | VEGF, Flt1, KDR2, neuropilin-1, neuropilin-2,                                     | <u>POSSIBLE EFFECT:</u><br>↑VEGF, Flt1 ●, KDR2 ●, ↑neuropilin-1, ↑neuropilin-2,                                                                                                                                                      |

| Authors         | Year | Type of study    | Hypothesis                                                                                                                                                                                                             | Material examined                                                      | Molecules investigated       | Effects observed in PA samples                                       |
|-----------------|------|------------------|------------------------------------------------------------------------------------------------------------------------------------------------------------------------------------------------------------------------|------------------------------------------------------------------------|------------------------------|----------------------------------------------------------------------|
| Galazka et al.  | 2008 | Research article | MT seems to be responsible for the proper coexistence between decidual cells and activated immune cells.                                                                                                               | Decidual samples:<br>Eutopic (31 CC, 32 PA)<br>Ectopic (19 CC)         | MT                           | ↑MT                                                                  |
| Norwitz et al.  | 2007 | Research article | Abruptio-associated decidual proteolysis and preterm labor is mediated primarily by thrombin-enhanced matrix metalloproteinase expression rather than an indirect effect on the plasminogen activator/inhibitor system | 23 placenta samples from ECC                                           | PAI-1, uPA, tPA              | <u>POSSIBLE EFFECT:</u><br><u>Decidual cells:</u> ↑PAI-1, uPA●, tPA● |
| Wicherek et al. | 2007 | Research article | Placental abruption seems to be associated with excessive accumulation and activity of CD3+ and CD56+ cells in decidua, which processes might, in turn, result from an insufficient RCAS1 decidual level.              | Decidual samples: 25 PA, 11 RPT<br>CONTROL: 30 PTB                     | RCAS1, CD3, CD56, CD69, CD25 | ↓RCAS1, ↑CD56, ↑CD3, ↑CD69, CD25●                                    |
| Wicherek et al. | 2006 | Research article | RCAS1 inhibits maternal immune response during gestation and parturition and has a potential involvement in the mechanism of PA.                                                                                       | (117 placenta tissue samples)<br>9 PA<br>CONTROL: 8 RPT, 40 VD, 60 ECC | RCAS1                        | ↓RCAS1                                                               |

| Authors          | Year | Type of study    | Hypothesis                                                                                                                                                                                                                                     | Material examined                                                                                                                               | Molecules investigated         | Effects observed in PA samples                |
|------------------|------|------------------|------------------------------------------------------------------------------------------------------------------------------------------------------------------------------------------------------------------------------------------------|-------------------------------------------------------------------------------------------------------------------------------------------------|--------------------------------|-----------------------------------------------|
| Lockwood et al.  | 2005 | Research article | Thrombin initiates the influx of neutrophils into the decidua via IL-8 expression. It explains how abruption-associated PPROM promotes decidual neutrophil infiltration                                                                        | Placental samples:<br>13 PA<br>2 PA & PPROM<br>8 controls - ECC<br>Decidual cells cultures from ECCs                                            | IL-8, CD15                     | ↑CD15<br><u>POSSIBLE EFFECT:</u><br>↑IL-8     |
| Uszyński et al.  | 2004 | Research article | Measured uPA and uPAR are present in all gestational tissues, in some in relatively high concentrations. Plasmin-dependent proteolytic system participate in obstetric complications such as placental abruption.                              | 35 set of samples form CC (placenta, myometrium, foetal membranes, amniotic fluid, blood serum)<br>CONTROL: 20 non-pregnant blood serum samples | uPA, uPAR                      | <u>POSSIBLE EFFECT:</u><br>↑uPA, ↑uPAR        |
| Di Simone et al. | 2003 | Research article | Homocysteine induced trophoblast apoptosis and significantly reduced human chorionic gonadotropin secretion. Trophoblast cell death might represent a pathogenic mechanism by which homocysteine may cause pregnancy complications such as PA. | Trophoblast cells culture                                                                                                                       | Homocysteine, M30, cytochrom c | <u>POSSIBLE EFFECT:</u><br>↑M30, ↑cytochrom c |

| Authors          | Year | Type of study    | Hypothesis                                                                                                                                                           | Material examined                                                                                                                                                            | Molecules investigated                                         | Effects observed in PA samples                                                               |
|------------------|------|------------------|----------------------------------------------------------------------------------------------------------------------------------------------------------------------|------------------------------------------------------------------------------------------------------------------------------------------------------------------------------|----------------------------------------------------------------|----------------------------------------------------------------------------------------------|
| Kuczyński et al. | 2002 | Research article | The levels of TF in placenta and myometrium, are increased in relation to TF in blood plasma. The placenta and myometrium are potential sources of TF.               | 48 strips of placenta and myometrium from 48CC at term + blood serum samples<br>CONTROL: 20 non-pregnant blood serum samples                                                 | TF, TFPI                                                       | <u>POSSIBLE EFFECT:</u><br>↑TF                                                               |
| Rosen et al.     | 2001 | Research article | Thrombin-enhanced MMP-1 expression provides an explanation for the strong association between placental abruption and preterm membrane rupture                       | Endometrial cells - from 7 hysterectomies (myomas)<br>FM and decidual cells - from 3 ECC                                                                                     | MMP-1                                                          | <u>POSSIBLE EFFECT:</u><br>↑MMP-1                                                            |
| Nakatsuka et al. | 1999 | Research article | CA and a portion of placental abruption may share a common cascade of placental injury. Nitric oxide and its metabolites may play an important role in this cascade. | Blood samples: 30 from healthy pregnant women, 16 from patients with CA<br>Placentas: 10 CA, 6 PA, 10 healthy term, 8 preterm from placenta previa or maternal heart disease | NO, NO syntase (eNOS, iNOS), nitrotyrosine, ICE                | <u>Placenta:</u> ↑iNOS, eNOS⊙, ↑nitrotyrosine                                                |
| Wang et al.      | 1987 | Research article | Cocaine users showed a significantly lower total number of placental β-adrenergic receptors, μ-opiate receptors and δ-opiate receptors.                              | Placental samples:<br>Cocaine user mothers<br>Controls                                                                                                                       | β-adrenergic receptors, μ-opiate receptors, δ-opiate receptors | <u>POSSIBLE EFFECT:</u><br>↓β-adrenergic receptors, ↓μ-opiate receptors, ↓δ-opiate receptors |
| Altshuler et al. | 1983 | Research article | HPL is elevated in placenta from PA patients.                                                                                                                        | Placental samples:<br>1 PA<br>1 PIH<br>1 FGR                                                                                                                                 | HPL                                                            | ↑HPL                                                                                         |

**Abbreviations:** □ activation; ☒inhibition; ⊙no effect; ↑ increased expression; ↓ decreased expression; \* concentration dependent; Akt = PKB = Protein kinase B = serine/threonine-specific protein kinase; AP-1 = activator protein 1; CA = chorioamnionitis; CCL2 = MCP1 = C-C motif chemokine ligand 2 = monocyte chemoattractant protein 1; CCL3 = MIP-1-α = C-C motif chemokine ligand 3 = macrophage

inflammatory protein 1- $\alpha$ ; CCL4 = MIP-1- $\beta$  = C-C motif chemokine ligand 4 = macrophage inflammatory protein 1- $\beta$ ; CCL5 = RANTES = C-C motif chemokine ligand 5 = regulated on activation, normal T-cell expressed and secreted; CD15+ = neutrophils; CD25+ = IL-2 receptor; CD3+ = lymphocytes T; CD56+ = NK cells; CD69+ = evidence of CD56 activity; COX = cyclooxygenases (COX1, COX2); CREB = cAMP response element-binding protein; CSF-2 = GM-CSF = granulocyte-macrophage colony-stimulating factor = colony - stimulating factor 2; CSF2R = granulocyte-macrophage colony-stimulating factor receptor = colony-stimulating factor 2 receptor; CXCL1 = GRO- $\alpha$  = C-X-C motif chemokine ligand 1 = growth regulated oncogene- $\alpha$ ; CXCL10 = IP-10 = IFN $\gamma$  induced protein 10RO; CXCL2 = MIP2- $\alpha$  = Gro- $\beta$  = Gro-2 = C-X-C motif chemokine ligand 2 = macrophage inflammatory protein 2- $\alpha$  = growth-regulated protein  $\beta$  = gro oncogene-2; ERK 1/2 MAPK = mitogen-activated protein kinase: subfamily of extracellular signal-regulated kinases; Flt1 = fms-like tyrosine kinase-1; G-CSF = granulocyte colony stimulating factor; GJA1 = CX-43 = gap junction alpha-1 protein = connexin 43; GM-CSF = granulocyte macrophage colony stimulating factor; GR = glucocorticoid receptor; HEECs = human endometrial endothelial cells; HPL = human placental lactogen; ICE = interleukin - 1 $\beta$  - converting enzyme = caspase-1; IFN $\gamma$  = interferon gamma; IL - 4 = interleukin 4; IL-10 = interleukin 10; IL-12 = interleukin 12; IL-17 = interleukin 17; IL-1 $\beta$  = interleukin - 1 $\beta$ ; IL-6 = interleukin 6; IL-8 = CXCL8 = interleukin 8; KDR2 = VEGFR-2 = kinase insert domain receptor 2 = vascular endothelial growth factor receptor 2; LA = lipoic acid; LPS = lipopolysaccharides; M30 = marker of apoptosis; MA = muscularised basal plate arteries; MLC2 = regulatory light chain of myosin II; MLCK = MLC kinase = myosin light chain kinase; MMP-1 = matrix metalloproteinase-2 = interstitial collagenase; MMP-2 = matrix metalloproteinase-2 = 72 kDa type IV collagenase = gelatinase A; MMP-3 = matrix metalloproteinase-3 = stromelysin-1; MMP-7 = matrix metalloproteinase-7 = matrilysin; MMP-9 = GELB = matrix metalloproteinase-9 = 92 kDa type IV collagenase = 92 kDa gelatinase or gelatinase B; MT = metallothionein; NF- $\kappa$ B = nuclear factor kappa-light-chain-enhancer of activated B cells (NF- $\kappa$ B p65 - one of NF- $\kappa$ B components); NO = nitric oxide; NOS = NO syntetase (iNOS = inducible NOS, eNOS = endothelial NOS); OT = oxytocin; OXTR = OTR = oxytocin receptor; p38 MAPK = mitogen-activated protein kinase: subfamily of p38 mitogen-activated protein kinases ; p65 = transcription factor p65 = nuclear factor NF-kappa-B p65 subunit; PAI = plasminogen activator inhibitors (PAI-1, PAI-2); PAR1 = F2R = protease-activated receptor 1; PAR4 = protease-activated receptor 4; PARP = poly (ADP-ribose) polymerase; PARs = protease-activated receptors = thrombin receptors (PAR1, PAR2, PAR3, PAR4); PGE2 = prostaglandin E2; PGE2-R = PTGER1, PTGER3 = prostaglandin E2 receptors; PGF2 $\alpha$  = prostaglandin F2 $\alpha$ ; PGF2 $\alpha$ -R = PTGFR = prostaglandin F2 $\alpha$  receptor; PR = PgR = progesterone receptor; PR-A = PgR-A = progesterone receptor A; PR-B = PgR-B = progesterone receptor B; PTB = preterm birth; PTGS2 = PGHS-2 = COX2 = prostaglandin-endoperoxidase synthase-2; PTL = preterm labour (CA-PTL = Chorioamnionitis PTL, I-PTL = idiopathic PTL, PA-PTL = PA PTL); RCAS1 = receptor-binding cancer antigen expressed on SiSo cells; ROCK = Rho-associated protein myosin light chain kinase; SOCS = suppressors of cytokine signaling (SOCS1, SOCS3); STAT3 = Signal transducer and activator of transcription 3; STAT5 = Signal transducer and activator of transcription 5; TDC = term decidua cells; TF = tissue factor; TFPI = tissue factor pathway inhibitor (TFPI, TFP2); THR = thrombin; TIMP3 = metalloproteinase inhibitor 3; TLR = Toll-like receptors; TNF $\alpha$  = tumor necrosis factor  $\alpha$ ; tPA = tissue plasminogen activator; uPA = urokinase plasminogen activator; uPAR = urokinase plasminogen activator receptor; VEGF = vascular endothelial growth factor



**Table S3.** Risk of bias assessment. *Note: This table is based on the Office of Health Assessment and Translation (OHAT) Risk of Bias Rating Tool for Human and Animal Studies [1].*

| Newcastle - Ottawa Quality Assessment Scale <sup>1</sup> - modified                        | Altshuler et al. 1983 | Wanget al. 1987 | Nakatsuka et al. 1999 | Rosen et al. 2001 | Kuczyński et al. 2002 | Disimone et al. 2003 | Uzýńskiet al. 2004 | Lockwood et al. 2005 | Wicherek et al. 2006 | Wicherek et al. 2007 | Norwitz et al. 2007 | Galazka et al. 2008 | Snegovskikh et al. 2009 | Kumaret al. 2011 | Avagliano et al. 2011 | Lockwood et al. 2012 | Puthiyachirakkal et al. 2013 | Kumaret al. 2014 | Mhatreet al. 2016 | Singhet al. 2019 | Sinkeyet al. 2020 | Nishimura et al. 2020 |
|--------------------------------------------------------------------------------------------|-----------------------|-----------------|-----------------------|-------------------|-----------------------|----------------------|--------------------|----------------------|----------------------|----------------------|---------------------|---------------------|-------------------------|------------------|-----------------------|----------------------|------------------------------|------------------|-------------------|------------------|-------------------|-----------------------|
| 1. Was administered dose or exposure level adequately randomized?                          | N/A                   | N/A             | N/A                   | N/A               | N/A                   | N/A                  | N/A                | N/A                  | N/A                  | N/A                  | N/A                 | N/A                 | N/A                     | N/A              | N/A                   | N/A                  | N/A                          | N/A              | N/A               | N/A              | N/A               | N/A                   |
| 2. Was allocation to study groups adequately concealed?                                    | N/A                   | N/A             | N/A                   | N/A               | N/A                   | N/A                  | N/A                | N/A                  | N/A                  | N/A                  | N/A                 | N/A                 | N/A                     | N/A              | N/A                   | N/A                  | N/A                          | N/A              | N/A               | N/A              | N/A               | N/A                   |
| 3. Did selection of study participants result in the appropriate comparison groups?        | N/A                   | +               | +                     | N/A               | +                     | N/A                  | +                  | +                    | +                    | +                    | N/A                 | +                   | N/A                     | N/A              | ++                    | ++                   | N/A                          | N/A              | N/A               | ++               | N/A               | N/A                   |
| 4. Did study design or analysis account for important confounding and modifying variables? | -                     | +               | +                     | N/A               | +                     | N/A                  | +                  | +                    | ++                   | ++                   | N/A                 | ++                  | N/A                     | N/A              | ++                    | +                    | N/A                          | N/A              | N/A               | ++               | N/A               | N/A                   |
| 5. Were experimental conditions identical across study groups?                             | N/A                   | N/A             | N/A                   | ++                | N/A                   | ++                   | N/A                | ++                   | N/A                  | N/A                  | ++                  | N/A                 | ++                      | ++               | N/A                   | ++                   | ++                           | ++               | ++                | N/A              | ++                | ++                    |

|                                                                                                                                                         |     |      |      |    |     |    |     |    |     |     |    |     |    |    |      |    |    |    |    |     |    |    |
|---------------------------------------------------------------------------------------------------------------------------------------------------------|-----|------|------|----|-----|----|-----|----|-----|-----|----|-----|----|----|------|----|----|----|----|-----|----|----|
| 6. Were research personnel blinded to the study group during the study? (or in in-vitro studies were the measurements done by computer/robotic system?) | N/A | N/A  | N/A  | ++ | N/A | ++ | N/A | ++ | N/A | N/A | ++ | N/A | ++ | ++ | N/A  | ++ | ++ | ++ | ++ | N/A | ++ | ++ |
| 7. Were outcome data complete without attrition or exclusion from analysis?                                                                             | N/A | NR/- | NR/- | +  | +   | +  | +   | +  | +   | +   | +  | +   | +  | +  | NR/- | +  | +  | +  | +  | ++  | +  | +  |
| 8. Can we be confident in the exposure characterization?                                                                                                | +   | +    | ++   | ++ | +   | +  | +   | ++ | ++  | ++  | ++ | ++  | ++ | +  | ++   | ++ | ++ | ++ | ++ | ++  | +  | +  |
| 9. Can we be confident in the outcome assessment (including blinding of assessors)?                                                                     | +   | +    | ++   | ++ | +   | ++ | ++  | ++ | +   | +   | ++ | +   | ++ | ++ | +    | ++ | ++ | ++ | ++ | +   | ++ | ++ |
| 10. Were all measured outcomes reported?                                                                                                                | +   | +    | +    | +  | +   | +  | +   | +  | ++  | ++  | ++ | ++  | ++ | +  | +    | ++ | ++ | ++ | ++ | ++  | ++ | ++ |
| 11. Were there no other potential threats to internal validity                                                                                          | -   | -    | +    | +  | +   | +  | +   | +  | +   | +   | ++ | +   | +  | +  | ++   | +  | ++ | ++ | +  | ++  | +  | +  |

[https://ntp.niehs.nih.gov/ntp/ohat/pubs/riskofbiastool\\_508.pdf](https://ntp.niehs.nih.gov/ntp/ohat/pubs/riskofbiastool_508.pdf) accessed on 11th April 2021.
